# Supplementary material
Source: HighWire-hosted journal article supplement (https://www.ajnr.org/content/suppl/2008/07/17/ajnr.A1125)
Supplement: 1125_table.pdf [file 1125_table.pdf]

**On-line Table: Gene expression pattern of aneurysms at 2 weeks and 12 weeks\***

| Gene Name                                           | GenBank ID | 2 Weeks | 12 Weeks | 12 Weeks vs 2 Weeks |
|-----------------------------------------------------|------------|---------|----------|---------------------|
| <b>Cell adhesion</b>                                |            |         |          |                     |
| Integrin $\beta$ 1                                  | AY195896   | –       | NS       | +                   |
| Integrin $\beta$ 3                                  | AF184591   | –       | –        | +                   |
| Integrin $\beta$ 8                                  | M73781     | –       | NS       | +                   |
| E-selectin                                          | M91004     | –       | NS       | +                   |
| P-selectin                                          | U39446     | –       | NS       | +                   |
| Growth-regulated oncogene (GRO)                     | U12310     | –       | NS       | +                   |
| Vascular cell adhesion molecule-1 (VCAM-1)          | AY212510   | +       | +        | +                   |
| Cadherin                                            | U289450    | –       | NS       | +                   |
| <b>Apoptosis</b>                                    |            |         |          |                     |
| DRAK1                                               | AB04219    | –       | NS       | +                   |
| Thrombospondin 1                                    | AF454919   | +       | +        | –                   |
| Fas antigen                                         | AB021296   | +       | +        | +                   |
| PAR $\gamma$ 3                                      | AY166781   | NS      | +        | +                   |
| <b>Cell cycle control/cell signaling pathways</b>   |            |         |          |                     |
| Bone morphogenetic protein-2                        | AF041421   | –       | –        | +                   |
| Bone morphogenetic protein-4                        | AF042497   | –       | NS       | +                   |
| Bone morphogenetic protein-5                        | AF412307   | –       | –        | NS                  |
| Bone morphogenetic protein-7                        | AF413111   | –       | –        | +                   |
| Caveolin                                            | AF495878   | –       | NS       | NS                  |
| Calmodulin dependent protein kinase II $\gamma$     | D14905     | –       | –        | +                   |
| Troponin C                                          | J03462     | –       | –        | +                   |
| MAP kinase activated protein kinase-2               | X75345     | –       | –        | +                   |
| Protein phosphatase-1                               | Y00701     | +       | NS       | –                   |
| MAP kinase kinase-1                                 | Z30163     | –       | NS       | +                   |
| <b>Chemokines/cytokines/inflammation</b>            |            |         |          |                     |
| Interferon $\gamma$                                 | AB01038    | –       | –        | +                   |
| Interleukin-1                                       | D21835     | –       | NS       | +                   |
| Interleukin-1 receptor antagonist                   | D21832     | –       | NS       | +                   |
| Interleukin-2                                       | AF068057   | –       | –        | +                   |
| Interleukin-4                                       | AF169170   | –       | –        | +                   |
| Interleukin-6                                       | AF169176   | –       | –        | +                   |
| Interleukin-8 receptor subtype B                    | L24445     | –       | NS       | +                   |
| Interleukin-8 receptor                              | M58021     | –       | –        | +                   |
| Interleukin-10                                      | AF068058   | –       | +        | +                   |
| Neutrophil-activating peptide 78                    | AF123437   | –       | NS       | +                   |
| Neutrophil attractant/activation protein-1          | M57439     | –       | NS       | +                   |
| Tumor necrosis factor                               | M12845     | –       | –        | +                   |
| Lectinlike oxidized LDL receptor                    | AB016237   | –       | –        | +                   |
| Osteonectin                                         | AF247647   | +       | +        | –                   |
| Nuclear factor of activated T-cells                 | AJ291311   | –       | NS       | +                   |
| CD86                                                | D49842     | –       | NS       | +                   |
| MHC class II RLA-DR- $\alpha$                       | M28161     | –       | NS       | +                   |
| HLA-DOB gene homologue II                           | M96942     | NS      | +        | +                   |
| <b>Growth factors and related genes</b>             |            |         |          |                     |
| Fibroblast growth factor                            | L12034     | –       | –        | +                   |
| Fibroblast growth factor receptor-2                 | AF184968   | –       | NS       | +                   |
| Insulinlike growth factor-1                         | AF022961   | +       | NS       | –                   |
| Insulinlike growth factor-2                         | U75390     | +       | +        | –                   |
| Platelet-derived growth factor- $\beta$             | AB020215   | –       | NS       | +                   |
| Transforming growth factor $\beta$ -1               | AF000133   | –       | –        | +                   |
| Transforming growth factor $\beta$ -2               | AY429466   | –       | NS       | NS                  |
| Vascular endothelial cell growth factor             | AY196796   | –       | NS       | NS                  |
| Vascular endothelial growth factor receptor-3       | AF453570   | –       | –        | +                   |
| Vascular endothelial growth factor receptor-2/Flk-1 | AB017155   | –       | –        | +                   |
| Elongation factor-1 $\alpha$                        | U09823     | –       | +        | +                   |
| Elongation factor-1 A2                              | AF035178   | –       | –        | +                   |
| Coroninlike protein pp66                            | AF056312   | –       | NS       | +                   |
| Coronin Retinoic acid receptor RXR $\alpha$         | AF136242   | –       | NS       | +                   |
| Heparin-binding epidermal growth factor             | AF333182   | –       | –        | +                   |
| Protein kinase C $\beta$                            | X04795     | NS      | +        | +                   |
| Protein kinase C $\delta$                           | M19338     | –       | –        | +                   |
| Protein kinase C $\gamma$                           | X04796     | –       | NS       | +                   |
| Protein kinase C-n                                  | M20014     | –       | NS       | +                   |
| Protein kinase c $\zeta$                            | U78768     | –       | NS       | +                   |

**On-line Table: Gene expression pattern of aneurysms at 2 weeks and 12 weeks\* (Continued)**

| Gene Name                                             | GenBank ID | 2 Weeks | 12 Weeks | 12 Weeks vs 2 Weeks |
|-------------------------------------------------------|------------|---------|----------|---------------------|
| Phosphorylase kinase $\alpha$                         | M64656     | -       | -        | +                   |
| Phosphorylase kinase $\beta$ subunit                  | M64657     | -       | -        | +                   |
| Epithelial Rho-associated-ser/thr kinase              | U42424     | -       | NS       | +                   |
| Rsc oncogene                                          | U82163     | -       | -        | +                   |
| Receptor tyrosine kinase (ErbB2)                      | AF333178   | -       | NS       | +                   |
| Serum and glucocorticoid-regulated protein kinase     | AF139639   | -       | NS       | +                   |
| <b>Vascular remodeling</b>                            |            |         |          |                     |
| Matrix metalloproteinase-1                            | M17820     | -       | -        | +                   |
| Matrix metalloproteinase-2                            | D63579     | +       | +        | -                   |
| Matrix metalloproteinase-3                            | AF059201   | -       | NS       | +                   |
| Matrix metalloproteinase-9                            | D26514     | +       | +        | +                   |
| Matrix metalloproteinase-12                           | AB006779   | +       | NS       | NS                  |
| Matrix metalloproteinase-14-membrane type 1           | U73940     | -       | NS       | +                   |
| Matrix metalloproteinase-15-membrane type 2           | U83918     | -       | -        | +                   |
| Tissue inhibitor of metalloproteinase-1               | J04712     | +       | +        | -                   |
| Tissue inhibitor of metalloproteinase-2               | AF069713   | +       | +        | -                   |
| Tissue inhibitor of metalloproteinase-3               | AF069714   | +       | +        | -                   |
| Tissue inhibitor of metalloproteinase-4               | AF069715   | -       | +        | +                   |
| Lens-specific calpain                                 | AF148956   | -       | -        | +                   |
| Eppin                                                 | AF346415   | -       | NS       | -                   |
| $\alpha$ -1-antitrypsin                               | L12139     | -       | NS       | +                   |
| Metalloproteinase synovial cell activator             | M25664     | -       | -        | +                   |
| Tissue factor pathway inhibitor-Kunitz-type           | S61902     | NS      | +        | -                   |
| Fertilin $\alpha$                                     | U46069     | -       | NS       | +                   |
| FK506 binding protein                                 | AY159324   | -       | NS       | +                   |
| Neuregulin-1 $\alpha$                                 | AY421758   | -       | -        | +                   |
| Cathepsin B                                           | L08418     | -       | NS       | +                   |
| Cellular disintegrin ADAM 6d                          | U82750     | -       | NS       | NS                  |
| Cellular disintegrin ADAM 6e                          | U82751     | -       | -        | +                   |
| Urokinase plasminogen activator (uPA)                 | AY453856   | NS      | +        | +                   |
| Tissue-type plasminogen activator (tPA)               | AY029518   | -       | NS       | +                   |
| Putative plasminogen activator inhibitor-1            | AF074325   | -       | -        | +                   |
| <b>Oxidative stress</b>                               |            |         |          |                     |
| Cytochrome P450 2D/I                                  | AB008784   | -       | NS       | +                   |
| Cytochrome P450 2D/II                                 | AB008785   | -       | NS       | NS                  |
| Cytochrome P-450 isozyme 6                            | M19917     | -       | -        | +                   |
| Cytochrome P-450 LM4                                  | M36538     | -       | -        | +                   |
| Cytochrome P-450 2B-Bx                                | L10912     | -       | NS       | +                   |
| NADPH-cytochrome P450 reductase                       | E01314     | +       | +        | -                   |
| Copper/zinc-superoxide dismutase                      | L12405     | -       | -        | +                   |
| Extracellular superoxide dismutase                    | Z67878     | -       | -        | +                   |
| Glutathione peroxidase                                | X13837     | -       | NS       | +                   |
| Glutathione S-transferase                             | L23766     | NS      | -        | -                   |
| Alcohol dehydrogenase I                               | X69799     | NS      | +        | +                   |
| Alcohol dehydrogenase II                              | AJ002388   | -       | NS       | +                   |
| 12-lipoxygenase                                       | Z97654     | -       | NS       | +                   |
| Heme oxygenase-2                                      | S61699     | -       | NS       | +                   |
| <b>Structural molecules</b>                           |            |         |          |                     |
| Large aggregating cartilage proteoglycan core protein | AB004812   | -       | NS       | +                   |
| Osteoglycin                                           | AF487889   | -       | +        | -                   |
| Collagen II                                           | D83228     | -       | NS       | +                   |
| Collagen II $\alpha$                                  | D49399     | +       | -        | -                   |
| Collagen III                                          | S83371     | +       | +        | +                   |
| Collagen IV                                           | L01477     | -       | -        | +                   |
| Collagen V                                            | AF451331   | +       | +        | -                   |
| Collagen VIII                                         | J05042     | +       | +        | -                   |
| Collagen X                                            | AF247705   | -       | -        | +                   |
| Collagen XII                                          | S78179     | -       | NS       | +                   |
| Collagen NC1 $\alpha$ 3 type IV                       | L47283     | -       | NS       | +                   |
| Myosin light chain                                    | M21983     | -       | -        | +                   |
| Myosin heavy chain                                    | U32574     | -       | -        | +                   |
| Vitronectin                                           | M55442     | -       | NS       | +                   |
| Muscle $\alpha$ -actinin                              | X62075     | -       | -        | -                   |
| Titin                                                 | X64696     | -       | -        | +                   |

**On-line Table: Gene expression pattern of aneurysms at 2 weeks and 12 weeks\* (Continued)**

| Gene Name                                                             | GenBank ID | 2 Weeks | 12 Weeks | 12 Weeks vs 2 Weeks |
|-----------------------------------------------------------------------|------------|---------|----------|---------------------|
| Transcription factors                                                 |            |         |          |                     |
| Upstream stimulatory factor 1a                                        | AF003894   | —       | NS       | +                   |
| Upstream stimulatory factor 1b                                        | AF003895   | —       | —        | +                   |
| Pregnane x receptor                                                   | AF182217   | —       | —        | +                   |
| c-myc                                                                 | AJ291307   | —       | —        | +                   |
| Early growth response 1 zinc-finger transcription factor (egr-1 gene) | AJ291320   | —       | NS       | +                   |
| Forkhead transcription factor L2                                      | AY340972   | —       | NS       | +                   |
| RUSH-1 $\alpha$                                                       | U66564     | —       | —        | +                   |
| Classical vascular/circulatory molecules                              |            |         |          |                     |
| Thrombin receptor                                                     | S73493     | —       | NS       | +                   |
| Transferrin                                                           | AB010995   | —       | NS       | +                   |
| Metabotropic glutamate receptor-6                                     | AY275542   | —       | NS       | +                   |
| Glucose transporter type-4                                            | AY339876   | —       | NS       | +                   |
| Blood coagulation factor VII                                          | U77477     | —       | —        | +                   |
| Blood coagulation factor X                                            | AF003200   | —       | —        | +                   |
| Blood coagulation factor XI                                           | AF395821   | —       | —        | +                   |
| Prothrombin precursor                                                 | AF080065   | —       | NS       | +                   |
| Adenosine A3 receptor                                                 | AF145438   | —       | NS       | +                   |
| Glycoprotein IIb                                                      | AF170528   | —       | —        | +                   |
| Glycoprotein IIIa                                                     | AF170529   | —       | NS       | +                   |
| Endothelin-1                                                          | X59931     | NS      | +        | +                   |
| Endothelin converting enzyme                                          | AY421757   | —       | NS       | NS                  |
| Endothelin receptor A                                                 | AF311974   | —       | —        | +                   |
| Endothelin receptor B                                                 | AF245469   | —       | —        | +                   |
| Haptoglobin                                                           | AF372520   | —       | —        | NS                  |
| Endothelial differentiation gene 1                                    | AF404275   | —       | NS       | NS                  |
| Acyl CoA binding protein                                              | AF407578   | —       | —        | +                   |
| Annexin VIII                                                          | AF012745   | —       | NS       | +                   |
| Annexin XIIIb                                                         | AF510726   | —       | —        | +                   |
| Hypoxia inducible factor 1 $\alpha$ subunit                           | AY273790   | —       | NS       | +                   |
| CAP-50                                                                | D10883     | —       | NS       | +                   |
| Angiotensin converting enzyme                                         | J05041     | —       | —        | +                   |
| Angiotensin-converting isozyme gene                                   | L23202     | —       | NS       | NS                  |
| Angiotensin receptor 2                                                | AF451328   | —       | NS       | +                   |
| Thrombin                                                              | M81396     | —       | NS       | +                   |
| Albumin precursor                                                     | U18344     | —       | —        | +                   |
| Apolipoprotein A-I                                                    | X06659     | —       | NS       | +                   |
| Apolipoprotein B mRNA editing protein                                 | U10695     | —       | —        | +                   |
| Apolipoprotein C-IV                                                   | U39356     | —       | NS       | +                   |
| Apolipoprotein E                                                      | M36603     | +       | NS       | —                   |
| Tryptophan hydroxylase                                                | M17250     | —       | NS       | +                   |
| Nitric oxide synthase                                                 | U91584     | —       | —        | +                   |
| Endothelial nitric oxide synthase (eNOS)                              | AY179960   | NS      | —        | +                   |
| Inducible nitric oxide synthase (iNOS)                                | U85094     | —       | NS       | NS                  |
| Neuronal nitric oxide synthase (nNOS)                                 | AF200350   | —       | NS       | +                   |
| Protein inhibitor of neuronal nitric oxide synthase                   | AF020710   | —       | —        | +                   |

**Note:**—ID indicates identification; +, the gene was up-regulated; —, the gene was down-regulated; NS, no significant difference when comparing aneurysms with controls or comparing aneurysm at 12 weeks with 2 weeks.

\* Statistical significance was taken as a *P* value of < .05.
